# Supplementary material for: Rectifying optoelectronic memory based on WSe2/graphene heterostructures
Source: Royal Society of Chemistry journal article supplement (doi:10.1039/d1na00504a), 2021-01-01
Supplement: d1na00504a1.pdf [file d1na00504a1.pdf]

## Supporting Information

### **Rectifying optoelectronic memory based on WSe<sub>2</sub>/graphene heterostructure**

*Sung Hyun Kim,<sup>a</sup> Myung Uk Park,<sup>a</sup> ChangJun Lee,<sup>a</sup> Sum-Gyun Yi,<sup>a</sup> Myeongjin Kim,<sup>a</sup> Yongsuk Choi,<sup>b</sup> Jeong Ho Cho<sup>b</sup> and Kyung-Hwa Yoo<sup>\*a</sup>*

- a. Department of Physics, Yonsei University, 50 Yonsei-ro, Seoul, 03722, Republic of Korea
- b. Department of Chemical and Biomolecular Engineering, Yonsei University, 50 Yonsei-ro, Seoul, 03722, Republic of Korea.

E-mail: khyoo@yonsei.ac.kr\*

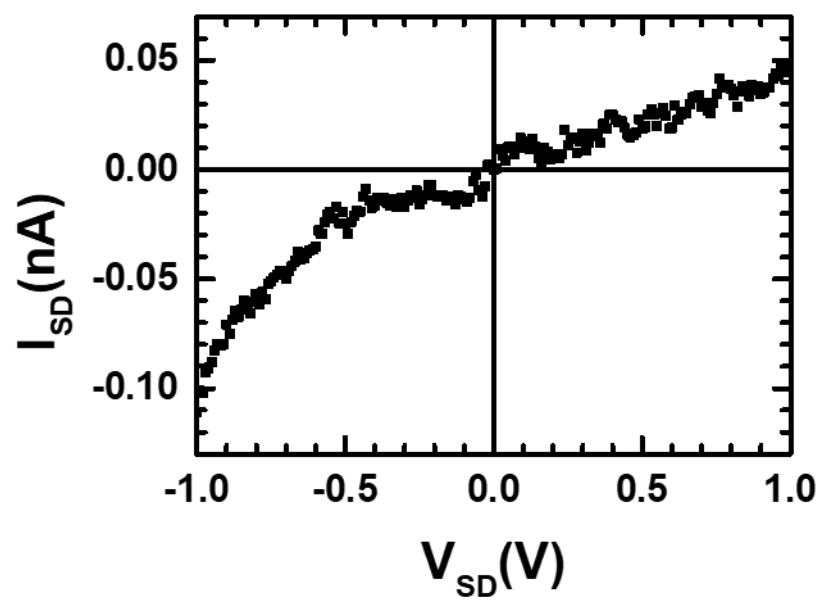

**Figure S1.**  $I_{SD}$  -  $V_{SD}$  curve measured before applying  $V_G$ .

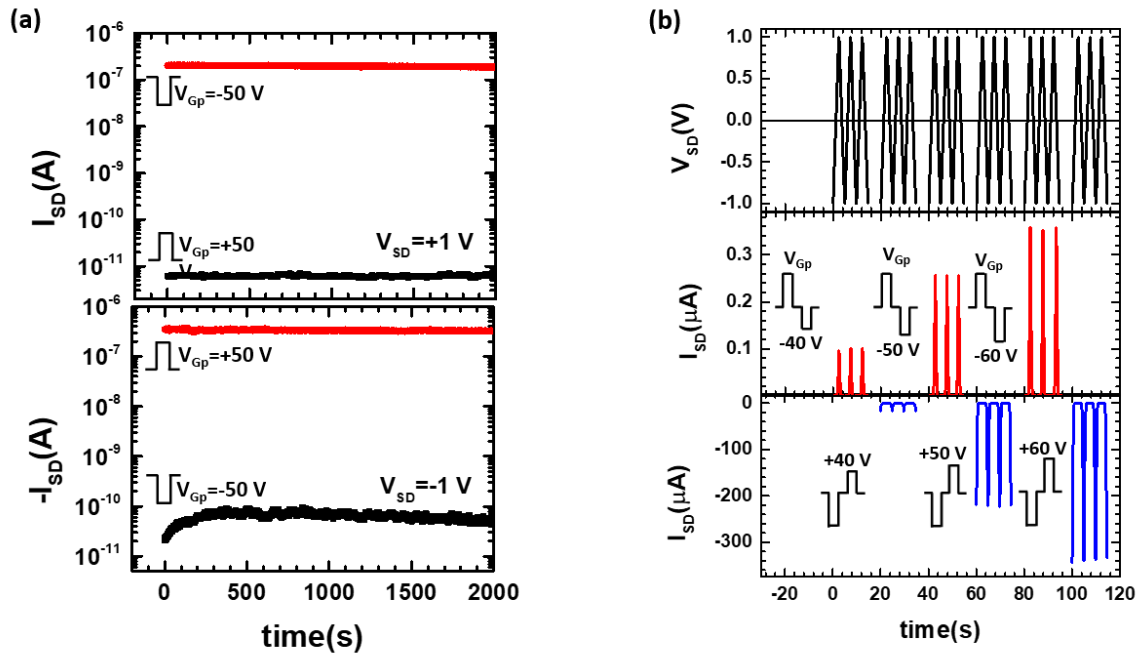

**Figure S2.** (a) Real-time  $I_{SD}$  measured at  $V_{SD} = +1$  V (top) and  $V_{SD} = -1$  V (bottom) after  $V_{Gp} = -50$  V or  $+50$  V was applied. (b)  $I_{SD}$  measured at  $V_{SD}$  of triangular waves with a frequency of 5 Hz (top) after applying various  $V_{Gp}$ . Before each measurement, the device was reset by applying  $V_{Gp} = +60$  V (middle) or  $V_{Gp} = -60$  V (bottom).

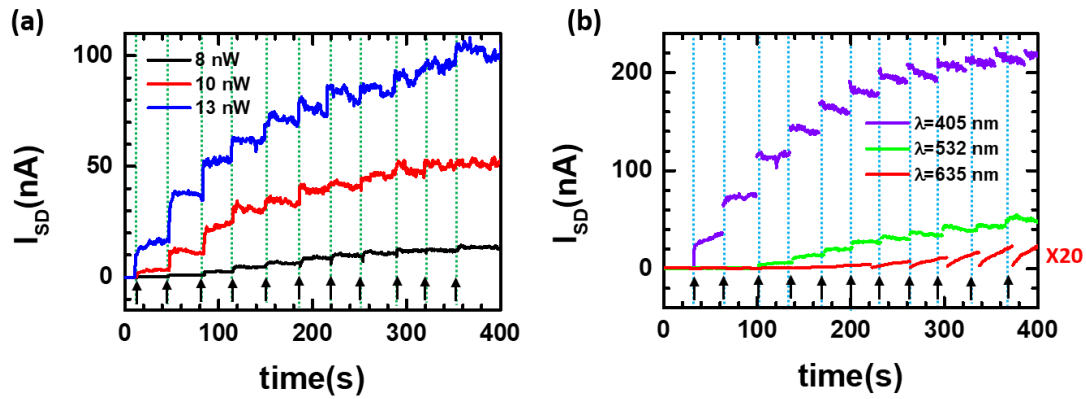

**Figure S3.** (a)  $I_{SD}$  measured at  $V_{SD} = +1$  V when  $V_{Gp} = +50$  V was applied to switch the device to the off state and then,  $V_{Gp} = -15$  V and 532-nm laser pulses with different powers were simultaneously applied. (b)  $I_{SD}$  measured at  $V_{SD} = +1$  V when  $V_{Gp} = +50$  V was applied to switch to the off state and then,  $V_{Gp} = -10$  V and laser pulses with different wavelengths and a power of 2 nW were simultaneously applied. The dotted lines indicate when the laser pulses were applied, while the arrows indicate the time at which  $V_{Gp}$  was applied.

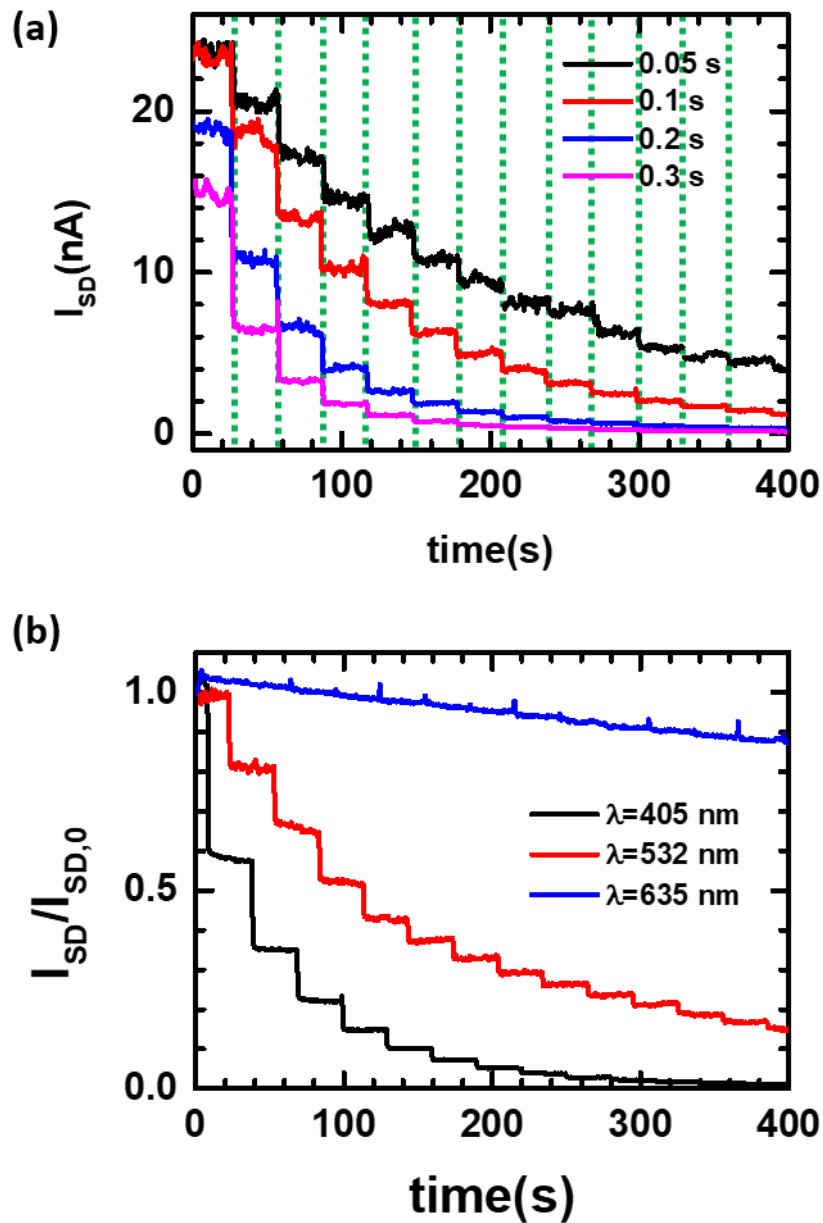

**Figure S4.** (a)  $I_{SD}$  measured at  $V_{SD} = +1$  V after  $V_{Gp} = -50$  V was applied and then, 532-nm laser pulses with different exposure times and a power of 2 nW were repeatedly applied. The dotted lines indicate the time when the laser pulses were applied. (b) Normalized  $I_{SD}$  measured at  $V_{SD} = +1$  V when laser pulses with different wavelengths and a power of 3 nW were applied after applying  $V_{Gp} = -50$  V.  $I_{SD,0}$  indicates the current level before illumination with laser pulses.

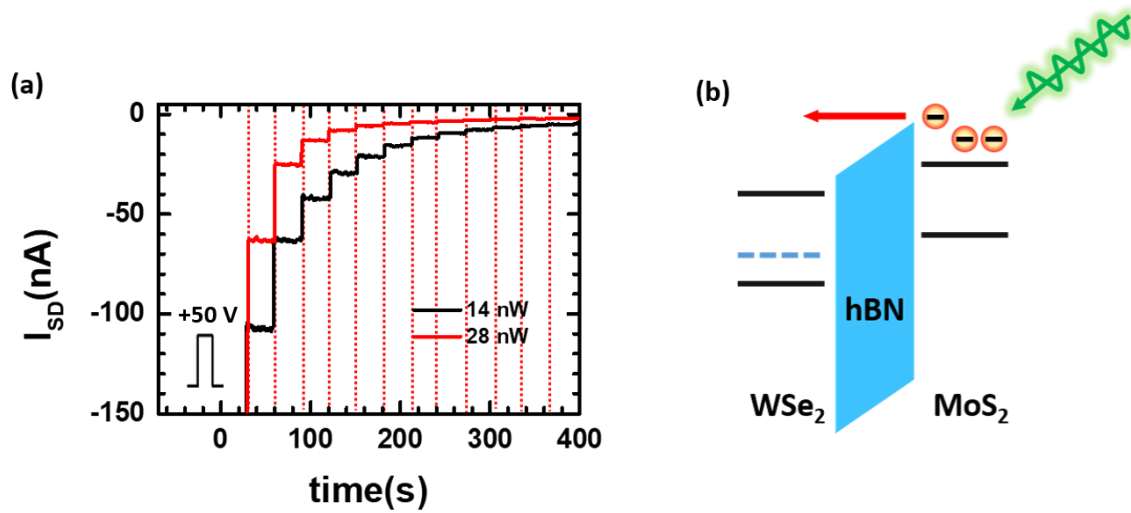

**Figure S5.** (a)  $I_{SD}$  measured at  $V_{SD} = -1$  V when  $V_{Gp} = +50$  V was applied to switch the device to the on state and then, 635-nm laser pulses with different powers were repeatedly applied. (b) Energy band diagram proposed to explain the negative stepwise photoconductance at  $V_{SD} = -1$  V.

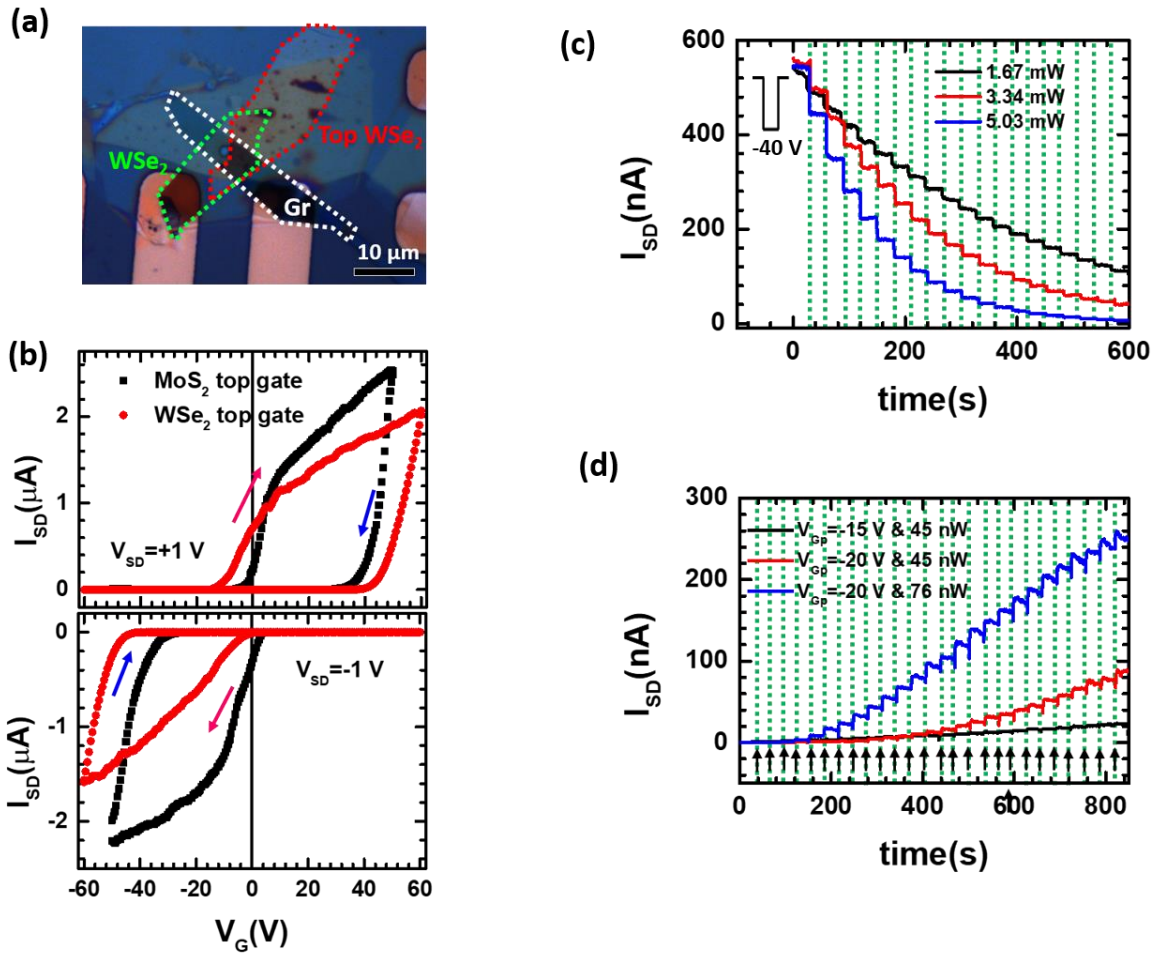

**Figure S6.** (a) Optical microscopy image of the WSe<sub>2</sub> - based device with the WSe<sub>2</sub> top layer. (b)  $I_{SD}$  -  $V_G$  transfer curves for the WSe<sub>2</sub> devices with the MoS<sub>2</sub> (black symbols) or WSe<sub>2</sub> top layer (red symbols) measured at  $V_{SD} = +1$  V and  $V_{SD} = -1$  V by sweeping  $V_G$  from  $-60$  to  $+60$  V and back to  $-60$  V. (c)  $I_{SD}$  measured at  $V_{SD} = +1$  V when  $V_{GP} = -40$  V was applied to switch to the on state and then, 532-nm laser pulses with different powers were repeatedly applied. (d)  $I_{SD}$  measured at  $V_{SD} = +1$  V when  $V_{GP} = +40$  V was applied to switch the device to the off state and then,  $V_{GP} = -15$  or  $20$  V and 532-nm laser pulses with different powers were repeatedly applied. The dotted lines indicate the time when the laser pulses were applied, while the arrows indicate the time at which  $V_{GP}$  was applied.

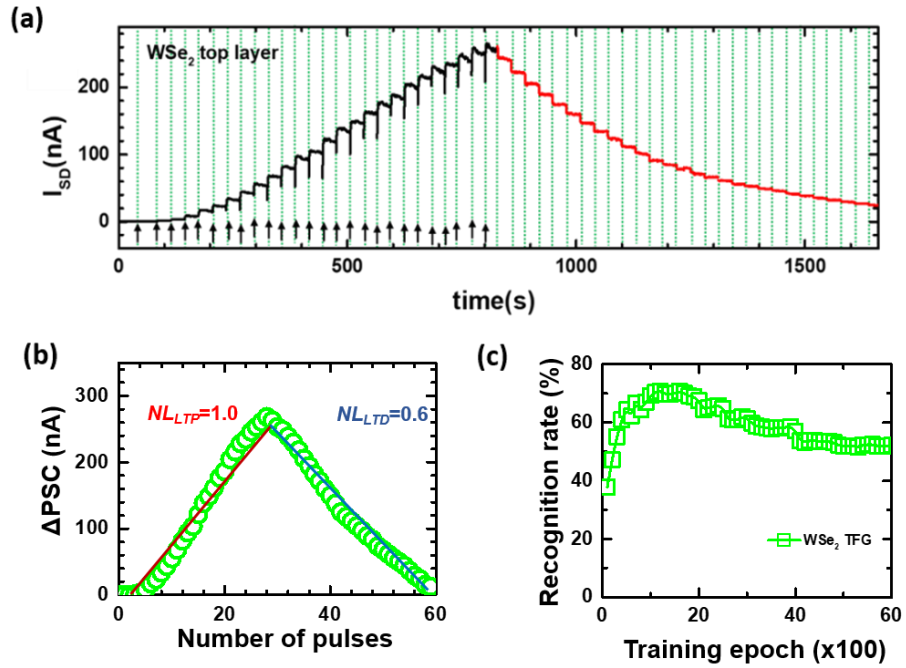

**Figure S7.** (a) Optoelectronic memory states of WSe<sub>2</sub> top layer/WSe<sub>2</sub>/graphene memory.  $I_{SD}$  was measured at  $V_{SD} = +1$  V when  $V_{GP} = -20$  V and 532-nm laser pulses (0.1 s, 54 nW) repeatedly applied from off state and 532-nm laser pulses (0.1 s, 10 nW) were applied without  $V_G$  from on state. (b) PSC measured according to number of pulses applied. The nonlinearity (NL) was estimated to be 1.0 and 0.6 for potentiation and depression, respectively. (c) Recognition rate of WSe<sub>2</sub> top layer device according to the number of training.

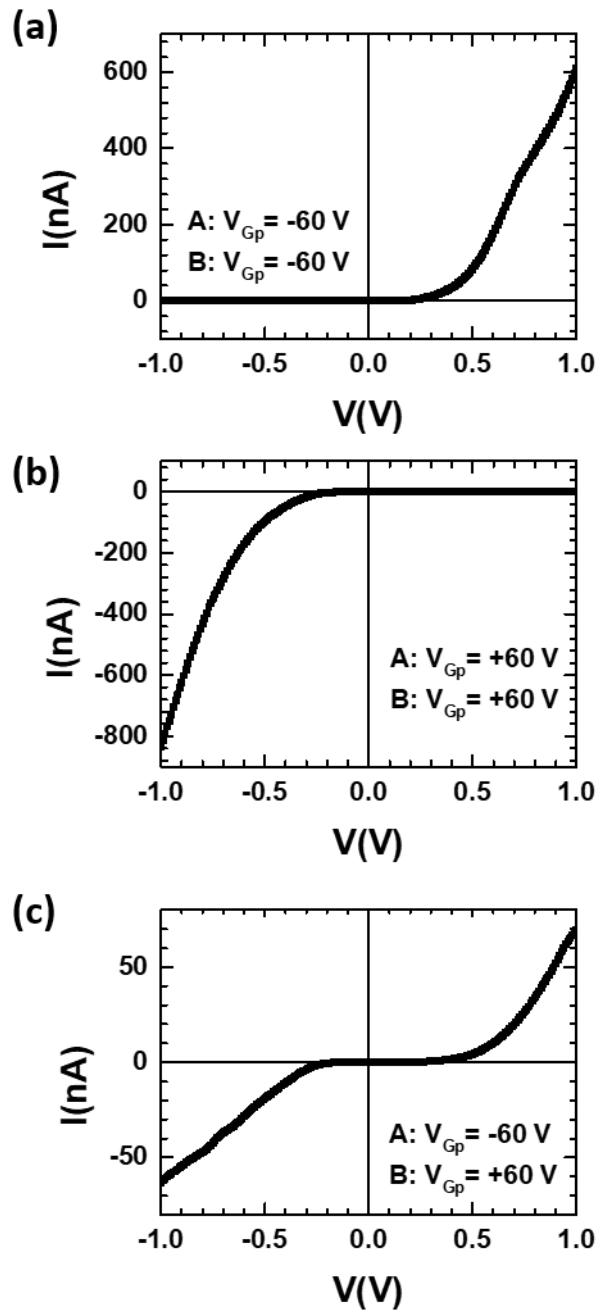

**Figure S8.**  $I$ - $V$  curves measured after (a)  $V_{Gp} = -60$  V or (b)  $V_{Gp} = +60$  V were applied to both devices A and B. (c)  $I$ - $V$  curves measured after  $V_{Gp} = -60$  V and  $V_{Gp} = +60$  V were applied to devices A and B, respectively.



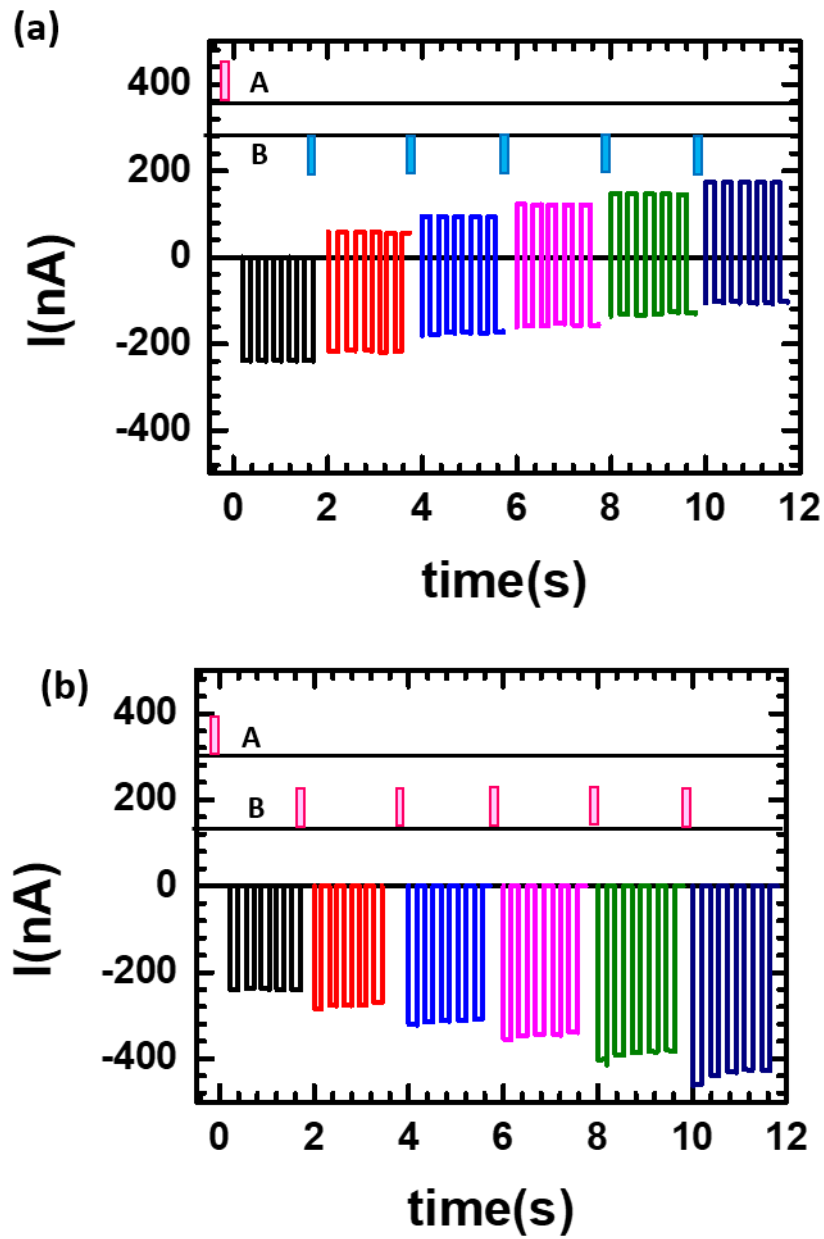

**Figure S9.**  $I$  measured at  $V$  of  $\pm 1$  V square waves with a frequency of 5 Hz when  $V_{Gp} = +50$  V was applied to device A, followed by repeatedly applying (a)  $V_{Gp} = -50$  V or (b)  $V_{Gp} = +50$  V to device B.

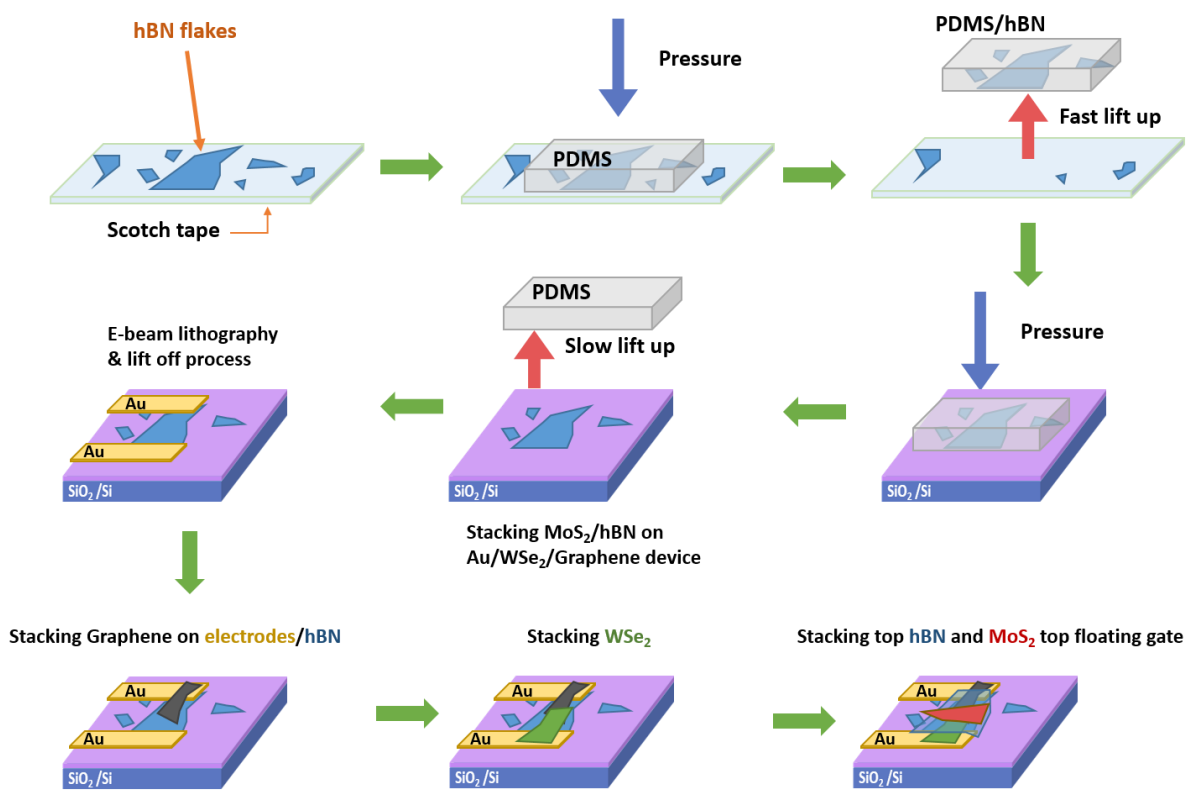

**Figure S10.** Schematic of the device fabrication process.
